# Supplementary material
Source: PubMed Central journal article supplement (PMC4356189)
Supplement: Supp_Figure1.pdf [file Supp_Figure1.pdf]

## Supplementary Data

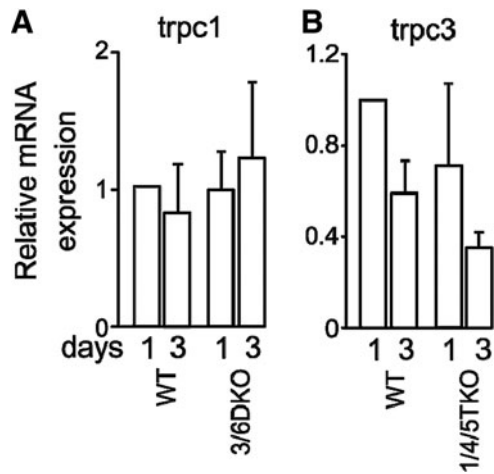

**SUPPLEMENTARY FIG. S1.** Canonical transient receptor potential (*Trpc*) channel mRNA expression in neural progenitor cells. Cells were differentiated for different time periods (1 day and 3 days). **(A)** Effect of TRPC3/6 deficiency (3/6 DKO) on *Trpc1* mRNA and **(B)** TRPC1/4/5 deficiency (1/4/5 TKO) on *Trpc3* mRNA. Data are from four different experiments  $\pm$  standard error of the mean.
