# Supplementary material
Source: PubMed Central journal article supplement (PMC4356189)
Supplement: Supp_Figure2.pdf [file Supp_Figure2.pdf]

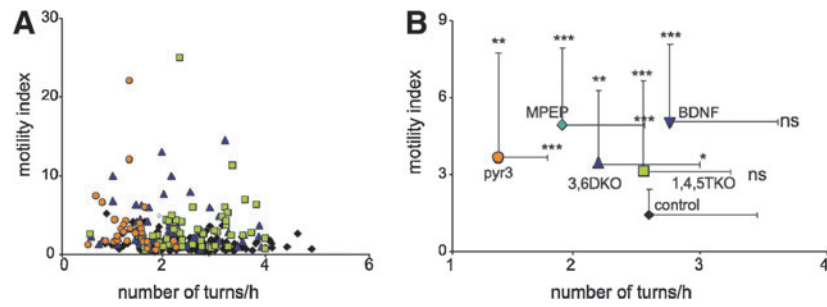

**SUPPLEMENTARY FIG. S2.** Correlation between motility and turning. **(A)** The motility of wild-type C57 and control Friends virus B cells pooled (99 cells), 3/6 DKO cells (61 cells), 1/4/5 TKO cells (58 cells), and cells treated with 1  $\mu$ M pyr3 (38 cells), was plotted against the respective turning frequency for each cell. **(B)** The average  $\pm$  standard deviation for the same cells as in **(A)**, as well as cells treated with 1  $\mu$ M MPEP (43 cells) and cells treated with 10 ng/ml BDNF (35 cells). \* $P$  < 0.05; \*\* $P$  < 0.01; \*\*\* $P$  < 0.001.
